# Supplementary material for: Mono-ADP-ribosylation by PARP10 inhibits Chikungunya virus nsP2 proteolytic activity and viral replication
Source: Cell Mol Life Sci. 2023 Feb 25;80(3):72. doi: 10.1007/s00018-023-04717-8 (PMC9959937; doi:10.1007/s00018-023-04717-8)
Supplement: Supplementary file 1 — Supplementary file1 (XLSX 35 KB) [file 18_2023_4717_MOESM1_ESM.xlsx]

## Sheet: Figure 1a
Means of 4 biological replicates
	siControl				siPARP10				siPARP12				siPARP14				siPARP15
9	3011.5	4956.35	5567	3129	4453.1	9274.45	7535.6	4119	4113.95	11157.8	12175	7356.65	2948.7	5215.25	6585.3	3968.25	2285.7	4893.95	6206.95	4562.6
12	10476.5	24927.3	26100	17226	12996.5	27997.4	26209.3	15881	15308.2	38605.6	39055.1	26571.5	14562	28234	32891.7	22103.5	10634.5	28648.6	31503.6	18159.1
24	11276.3	29473.6	29389	20145	14899.8	32809.7	29356.1	17720.4	17312	42657.2	43973.8	29747.5	16224.4	30196.3	35981.6	25567.6	12359.4	32449.2	34982.2	23248.2
9	1	1	1	1	1.4787	1.87123	1.35362	1.3164	1.36608	2.25122	2.187	2.35112	0.979147	1.05224	1.18292	1.26822	0.758991	0.98741	1.11495	1.45817
12	1	1	1	1	1.24053	1.12316	1.00419	0.921923	1.46119	1.54873	1.49636	1.54253	1.38997	1.13265	1.26022	1.28315	1.01507	1.14929	1.20704	1.05417
24	1	1	1	1	1.32133	1.11319	0.998882	0.879645	1.53525	1.4473	1.49627	1.47667	1.4388	1.02452	1.22432	1.26918	1.09604	1.10096	1.19032	1.15404

## Sheet: Figure 1d
Means of 3 - 5 biological replicates (2technical replicates)
	ctrl					PARP10					PARP10-GW					PARP12			PARP12-HY
24h	A	B	C	D	E	A	B	C	D	E	A	B	C	D	E	C	D	E	C	D	E
	31736	46873	64638	164107	64831	9128	22374	40070.7	105288	55105.2	24273	47393	56219	121999	60598.8	33723.7	123004	28792	42898.1	102660	64955
	31328	50849	67932.4	163810	65183	8934	23149	42165.5	106718	54304.4	26373	43253	54936	121601	62980.6	32518.9	119708	28085	43540.5	99473	65302
means	31532	48861	66285.2	163958	65007	9031	22761.5	41118.1	106003	54704.8	25323	45323	55577.5	121800	61789.7	33121.3	121356	28438.5	43219.3	101066	65128.1
	1	1	1	1	1	0.286407	0.465842	0.620321	0.646523	0.841522	0.803089	0.927591	0.83846	0.742871	0.950508	0.499679	0.740163	0.437468	0.65202	0.616415	1.00186

## Sheet: Figure 1g
averages Experiment I-III, 24hpi
	MOI 0.2			MOI 0.6
Mock	0.24	0.09	0.33	0.24	0.09	0.33
empty vector	8.27	5.78	5.02	16.09	18.2	32.88
PARP10 wt	2.26	1.96	2.71	5.72	5.88	9.47
PARP10 GW	9.63	8.77	10.92	28.13	28.64	39.7
PARP12 wt	4.35	4.63	6.49	8.74	10.02	20.82
PARP12 HY	3.92	3.74	5.99	10.73	12.55	24.43
averages Experiment I-III, 48hpi
	MOI 0.2			MOI 0.6
Mock	0.1	0.09	0.07	0.1	0.09	0.07
empty vector	88.1	82.93	87.71	87.01	89.03	88.75
PARP10 wt	65.08	58.22	54.74	67.9	77.25	76.77
PARP10 GW	91.37	89.89	90.62	88.64	91.73	90.68
PARP12 wt	75.71	83.76	79.43	73.35	83.82	84.51
PARP12 HY	82.7	85.93	84.45	76.34	86.21	87.91

## Sheet: Figure 2a
means of three biological replicates (2 technical replicates)
	control			PARP12			PARP12-HY			PARP10			PARP12 + PARP12			PARP10-GW
	A	B	C	A	B	C	A	B	C	A	B	C	A	B	C	A	B	C
9h	5716	3262.3	2973	3511.95	1985.5	1742	3967.6	2663.55	1870	1621.75	1198.7	1241.75	1357.95	1109	1042.2	4912.5	2475.95	2567
	1	1	1	0.614407	0.60862	0.58594	0.694122	0.816464	0.628994	0.283721	0.36744	0.417676	0.23757	0.339944	0.350555	0.85943	0.758958	0.863438
30h	control			PARP12			PARP12-HY			PARP10			PARP12 + PARP12			PARP10-GW
	A	B	C	A	B	C	A	B	C	A	B	C	A	B	C	A	B	C
	71995.2	33843	22664.8	34591.6	19358	12819.8	64258.8	34076.5	16227.3	44477.2	11039.5	10440.4	15729	4530	4731.1	45043	19449.2	19119.7
	1	1	1	0.480471	0.571994	0.565627	0.892542	1.0069	0.715973	0.61778	0.326197	0.460645	0.218472	0.133853	0.208743	0.625638	0.574689	0.843585

## Sheet: Figure 2d
means of three biological replicates (2technical replicates)
wt			CASA			D10A			V33E
82341	51843	39933	1091	912.5	1235.5	2196.5	1994	1861.5	2802.5	2207.5	1479.5
1	1	1	0.0132498	0.0176012	0.0309393	0.0266757	0.0384623	0.0466156	0.0340353	0.0425805	0.0370496

## Sheet: Figure 2g
	GFP		CHIKV-replicon-wt		CHIKV-replicon-466-2EGFP-wt		CHIKV-replicon-466-2EGFP-CASA		CHIKV-replicon-466-2EGFP-V33E		CHIKV-replicon-383-3EGFP-wt		CHIKV-replicon-383-3EGFP-CASA		CHIKV-replicon-383-3EGFP-V33E
A	1171.9	2647.8	33077.8	33023.6	8862.5	9395	1007.3	942.5	861.6	1393.3	20469	22083.9	970.3	1079.3	1416.8	2219.3
B	1391.2	2680.3	18593.3	19052.8	5908.4	6711	1232.6	1191.4	1147.3	1612.7	9639.8	9804.1	1268.4	1291.4	1516.9	2380.2
C	1294.5	2430.2	16706.4	16084.4	6043.8	6679.3	1124.9	1107.9	1027.8	1519.6	12058.8	12246.7	1160.1	1187.8	1387.6	2197.3
meas
A		1909.85		33050.7		9128.75		974.9		1127.45		21276.5		1024.8		1818.05
B		2035.75		18823		6309.7		1212		1380		9721.95		1279.9		1948.55
C		1862.35		16395.4		6361.55		1116.4		1273.7		12152.8		1173.95		1792.45
		1		17.3054		4.77983		0.510459		0.590334		11.1404		0.536587		0.951933
		1		9.24625		3.09945		0.595358		0.677883		4.77561		0.628712		0.957166
		1		8.80361		3.41587		0.599458		0.683921		6.52549		0.630359		0.962467

## Sheet: Figure 3b
means of three biological replicates (2 technical replicates)
	control		CHIKV-wt		CHIKV-CASA		CHIKV-V33E		CHIKV-V33E + CASA
A	1603	1002	20469	22083.9	970.3	1079.3	1416.8	2219.3	14855.1	15011.8
B	1697.2	1217.9	9639.8	9804.1	1268.4	1291.4	1516.9	2380.2	9909.1	10135.4
C	1649	1131.8	12058.8	12246.7	1160.1	1187.8	1387.6	2197.3	8804.7	8671.9
means		1302.5		21276.5		1024.8		1818.05		14933.4
		1457.55		9721.95		1279.9		1948.55		10022.2
		1390.4		12152.8		1173.95		1792.45		8738.3
		1		16.3351		0.786795		1.39582		11.4652
		1		6.67006		0.878117		1.33687		6.87609
		1		8.74047		0.844325		1.28916		6.28474

## Sheet: Figure 3j
	3-EGFP-Repl		3-EGFP-Repl-V33E		3-EGFP-Repl-V33E + GFPnb		3-EGFP-Repl-V33E + GFPnb-V33E
A	16891	17283	1727	1815	2149	2074	1699	1663
B	18796.3	19899.3	1747.2	1765.3	2511.5	2443.4	1597.1	1519.2
C	36180.6	37200.6	1414.2	1422.8	1865.5	1814.9	1270.4	1251.9
means
A		17087		1771		2111.5		1681
B		19347.8		1756.25		2477.45		1558.15
C		36690.6		1418.5		1840.2		1261.15
A		9.64822		1		1.19226		0.949181
B		11.0165		1		1.41065		0.887203
C		25.8658		1		1.29729		0.889073

## Sheet: Figure 5f
unprocessed substrate										fragment 1 (GFP)									fragment 2 (GST)
	NK 0	PK	CASA	D10	GW	macro	nsP3	NK 120		NK 0	PK	CASA	D10	GW	macro	nsP3	NK 120		NK 0	PK	CASA	D10	GW	macro	nsP3	NK 120
A	6342075	877770	9526095	5627660	1888205	3992054	4804004	11227217		0	9873146	0	4497811	8565903	6924368	6532368	0		0	5185962	0	2823598	6647912	3512719	5244255	0
B	8002953	1093477	10273631	7401439	1409598	3968397	4707054	7446024		0	8929731	0	931648	10001167	7608267	9200095	0		0	8015196	0	1750134	7719782	3944690	4245811	0
C	10301045	1551548	9443217	6389903	527163	3954640	5533539	10212924		0	4387054	0	2999861	9891560	6154660	3212397	0		0	5678761	0	3139104	8552317	5458175	3040397	0
D	5212296	792820	11115167	8373974	987648	2495912	3150861	3217447		0	9466024	0	505870	9129731	6182246	2774740	0		0	8953125	0	6609267	11281095	8630853	7381439	0
E	8648560	4868418	10115752	8374095	812941	4207054	5017004	10486631		0	6878660	0	2454619	9236853	6730489	4611418	0		0	8025004	0	6851439	15805309	10511581	8059924	0
F	7103782	2689983	13021823	8412217	726113	4577882	4703882	6747024		0	4612468	0	675406	8876731	5661660	4361711	0		0	4706640	0	4186125	10254853	8446610	5426418	0
A	1	0.138404	1.50205	0.887353	0.297727	0.629456	0.757481	1.77028		0	1	0	0.45556	0.867596	0.701333	0.66163	0		0	1	0	0.544469	1.28191	0.677351	1.01124	0
B	1	0.136634	1.28373	0.924838	0.176135	0.495867	0.588165	0.93041		0	1	0	0.104331	1.11999	0.852015	1.03028	0		0	1	0	0.218352	0.963143	0.492151	0.52972	0
C	1	0.15062	0.916724	0.620316	0.0511757	0.383907	0.537182	0.991445		0	1	0	0.683799	2.25472	1.40291	0.732245	0		0	1	0	0.55278	1.50602	0.961156	0.535398	0
D	1	0.152106	2.13249	1.60658	0.189484	0.478851	0.604505	0.61728		0	1	0	0.0534406	0.964474	0.653098	0.293126	0		0	1	0	0.738208	1.26002	0.964005	0.824454	0
E	1	0.562917	1.16965	0.968265	0.0939973	0.486446	0.580097	1.21253		0	1	0	0.356846	1.34283	0.978459	0.670395	0		0	1	0	0.853761	1.96951	1.30985	1.00435	0
F	1	0.378669	1.83308	1.18419	0.102215	0.644429	0.662166	0.949779		0	1	0	0.146431	1.92451	1.22747	0.945635	0		0	1	0	0.889408	2.17881	1.79462	1.15293	0
														sum of the unprocessed fragments 1 and 2
														NK 0	PK	CASA	D10	GW	macro	nsP3	NK 120
														0	15059108	0	7321409	15213815	10437087	11776623	0
														0	16944927	0	2681782	17720949	11552957	13445906	0
														0	10065815	0	6138965	18443877	11612835	6252794	0
														0	18419149	0	7115137	20410826	14813099	10156179	0
														0	14903664	0	9306058	25042162	17242070	12671342	0
														0	9319108	0	4861531	19131584	14108270	9788129	0
														0	1	0	0.486178	1.01027	0.693075	0.782027	0
														0	1	0	0.158265	1.0458	0.681794	0.793506	0
														0	1	0	0.609883	1.83233	1.15369	0.621191	0
														0	1	0	0.38629	1.10813	0.804223	0.551392	0
														0	1	0	0.624414	1.68027	1.1569	0.850217	0
														0	1	0	0.521673	2.05294	1.51391	1.05033	0

## Sheet: Supplementary 1b
siControl	siPARP10	siControl	siPARP12	siControl	siPARP14	siControl	siPARP15
1	0.612219	1	0.341395	1	0.333099	1	0.576337

[truncated: 4 more sheets: Supplementary 1f, Supplementary 4a, Supplementary 4d, Supplementary 4g]
